# Supplementary material for: Mismatch between physicians and family members views on communications about patients with chronic incurable diseases receiving care in critical and intensive care settings in Georgia: a quantitative observational survey
Source: Springer Nature journal article supplement (doi:10.1186/s12904-016-0135-2), 2016-07-22
Supplement: MOESM1 [file 10514498]

**Figure 5.** Distribution of responses from physicians and patients' family members to question 1.5 and 2.5

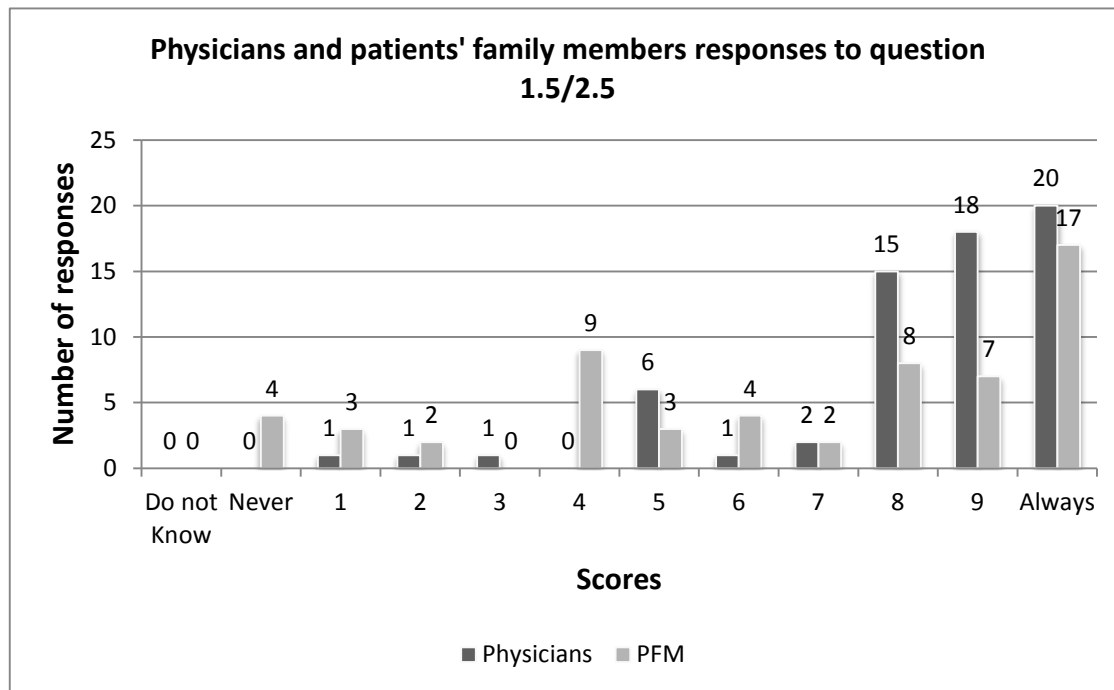

Black bars represent the distribution of physicians' responses, grey bars – responses of patients' family members. Numbering of figure indicates the question number in questionnaire.
